# Supplementary material
Source: MDPI journal article supplement (https://www.mdpi.com/1999-4907/12/11/1437)
Supplement: s1 [file s1]

## Supplement 1.

### Key to *Ganoderma* species

1. Species with perennial, astipitate fruitbodies; pileus non laccate .....2.
1. Species with annual to perennial fruitbodies, often with stipes; pileus laccate .....3.
2. Tube layers visibly separated with brown line of trama, older tubes filled with mycelium; crust on pileus surface thinner; basidiospore size  $6.5-8.5 \times 4.5-6 \mu\text{m}$  .....*Ganoderma applanatum*
2. Tube layers are not visibly separated, older tubes are not filled with mycelium; crust on pileus surface thickner; basidiospore size  $8.6-13 \times 5.5-9 \mu\text{m}$ .....*Ganoderma adspersum*
3. Species with annual to perennial fruitbodies sometimes with rudimentary stipes; pileus surface exudes resinous substances, which melts in contact with flame of match and it creates smooth surface after getting solid again ..... 4.
3. Species with annual stipitate fruitbodies; pileus surface doesn't exude resinous substances.....5.
4. Light colored trama, cork color, resinous layer is continuous; fruitbodies sometimes with rudimentary stipes ..... *Ganoderma resinaceum*
4. Dark colored trama, resinous layer is not continuous; fruitbodies without rudimentary stipes..... *Ganoderma pfeifferi*
5. Coniferous tree as a host plant in majority of cases; pileus surface dark, burgundy brown color, almost black ..... *Ganoderma carnosum*
5. Usually broadleaf tree as a host plant; pileus surface bright shiny with yellow tones, light reddish brown to dark reddish brown or mahogany ..... *Ganoderma lucidum s.str.*

Trends in variables affecting *Ganoderma* samples temporal and spatial distribution, and *Ganoderma* species host specificity.

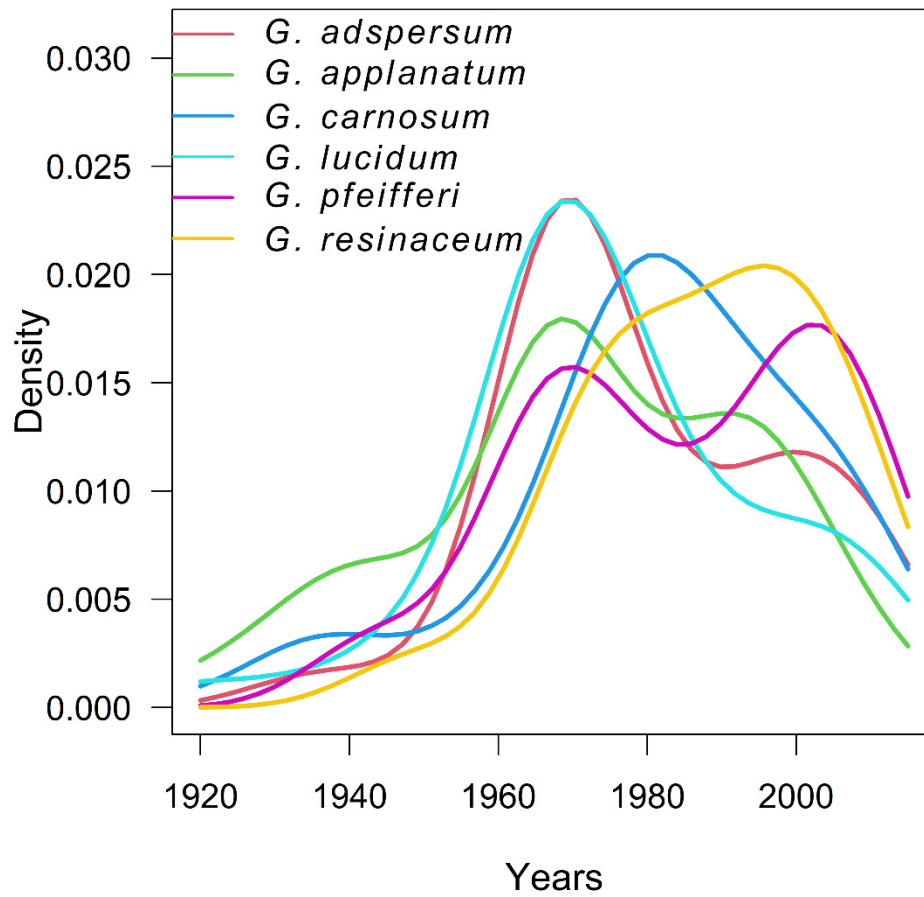

**Figure S1.** Temporal trends in *Ganoderma* species sampling. The sampling pattern of individual *Ganoderma* species during the years was very distinct ( $P < 0.001$ ).

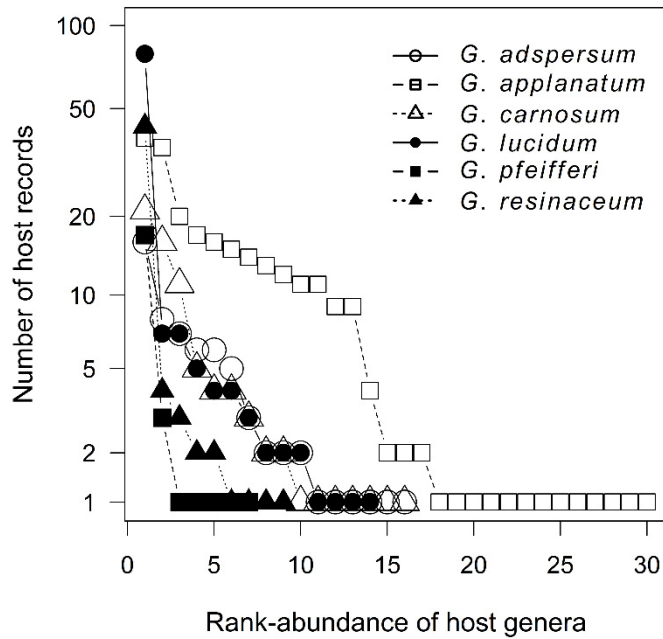

**Figure S2.** Whittaker rank-abundance plot for host tree genera of individual *Ganoderma* species

#### ***Propensity of Ganoderma species to parasitism – Other trends***

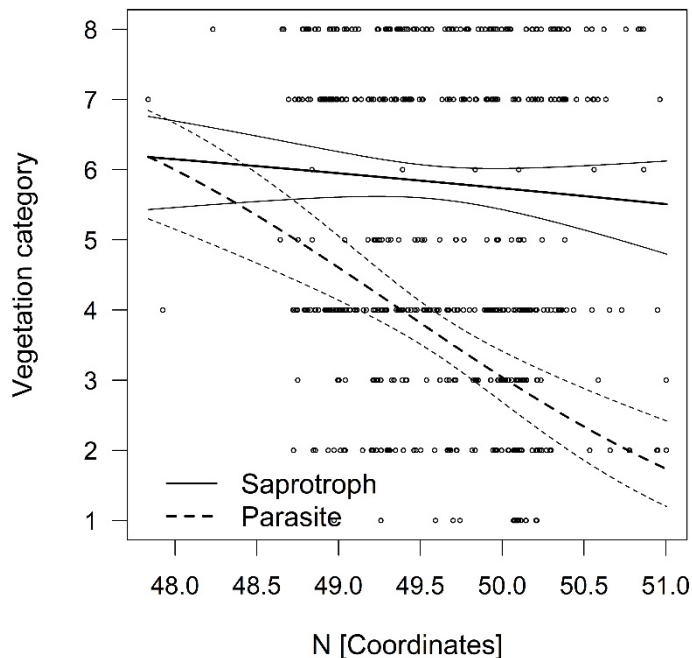

**Figure S3.** Average vegetation category along the latitudinal gradient for saprotrophic and parasitic *Ganoderma* samples. *Ganoderma* samples were sampled along latitudinal gradient in decreasing vegetation categories ( $df = 442$ ,  $\chi^2 = 11.70$ ,  $P < 0.001$ ) and parasitic *Ganoderma* samples are from lower vegetation categories than saprotrophic ones ( $df = 442$ ,  $\chi^2 = 93.29$ ,  $P < 0.001$ ). The slope of

decrease of vegetation category along latitudinal gradient differs strongly between parasitic and saprotrophic *Ganoderma* samples ( $df = 442$ ,  $\chi^2 = 10.13$ ,  $P = 0.001$ ), whereas there is strong relationship for parasitic ones, the saprotrophic ones decreases gently.

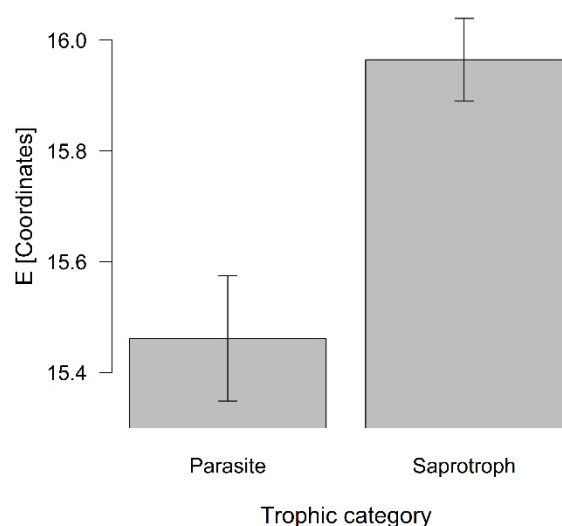

**Figure S4.** E coordinates for parasitic and saprotrophic trophic category (mean  $\pm$  SE). Saprotrophic *Ganoderma* samples has in average higher east coordinates (they are shifted east), than parasitic *Ganoderma* samples ( $df = 444$ ,  $F = 13.75$ ,  $P < 0.001$ ).

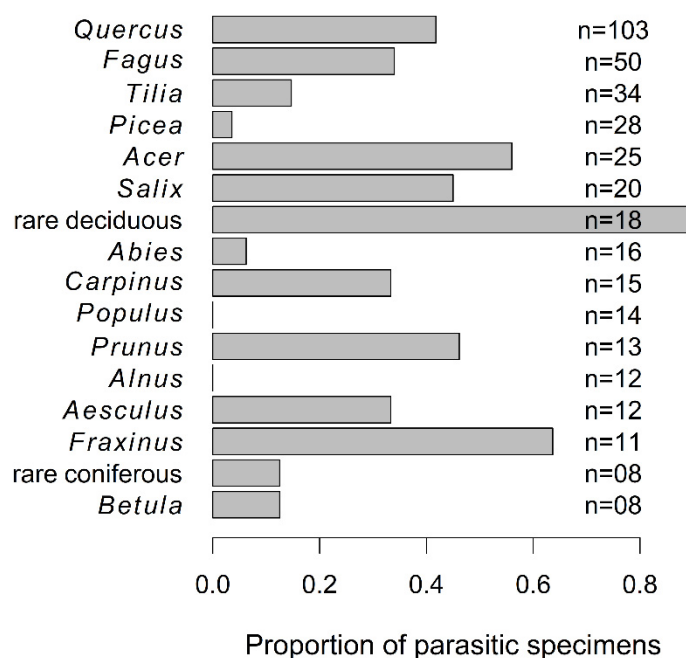

**Figure S5.** Proportion of parasitic specimens of *Ganoderma* sampled on individual host genera.
